# Supplementary material for: Terrestrial Origin of Viviparity in Mesozoic Marine Reptiles Indicated by Early Triassic Embryonic Fossils
Source: PLOS journal article supplement (doi:10.1371/journal.pone.0088640), 2014-02-12

Figure S2. High resolution version of Fig. 2.

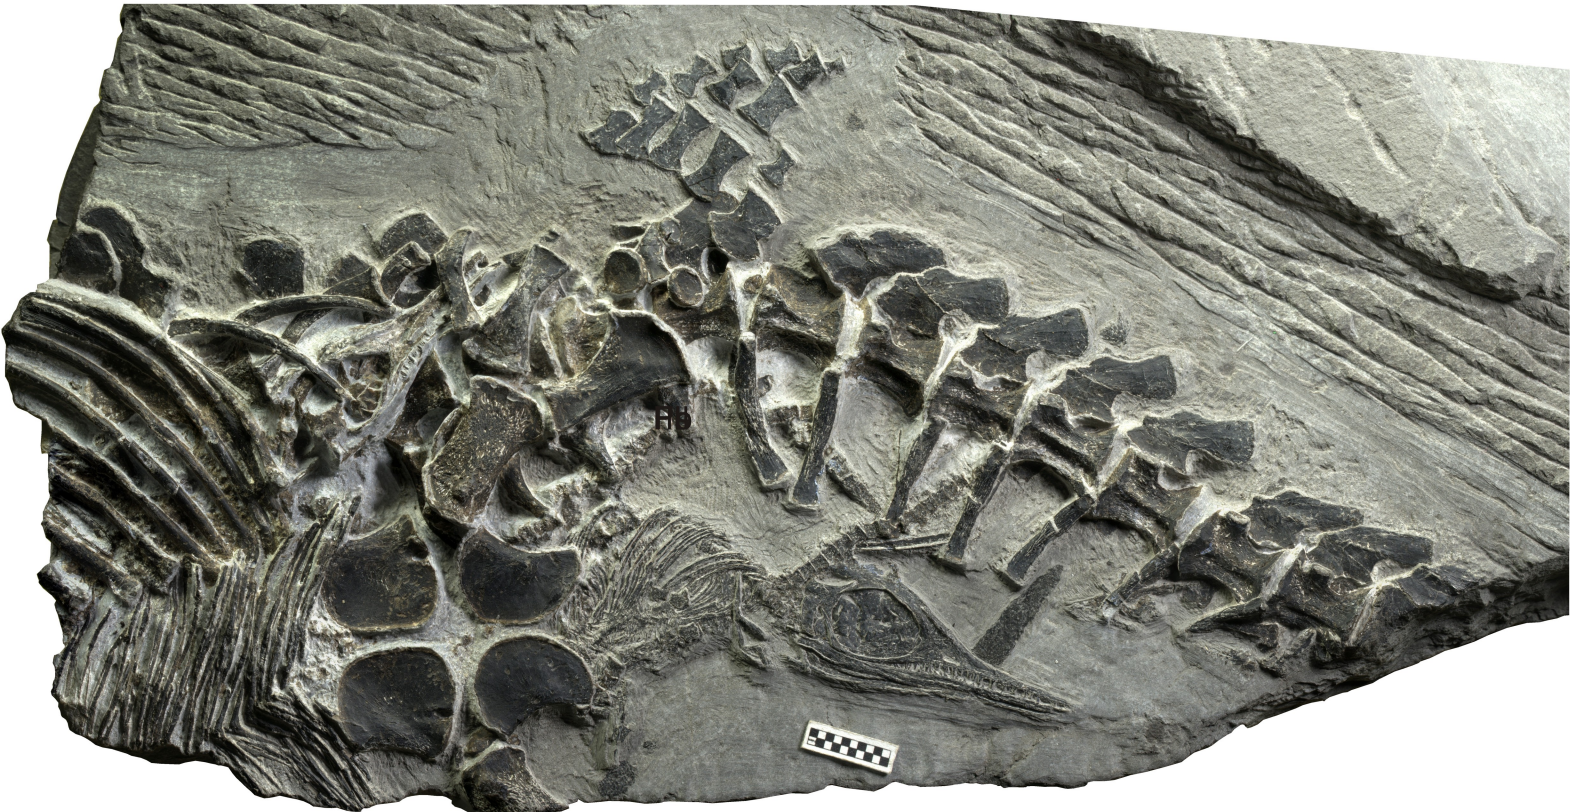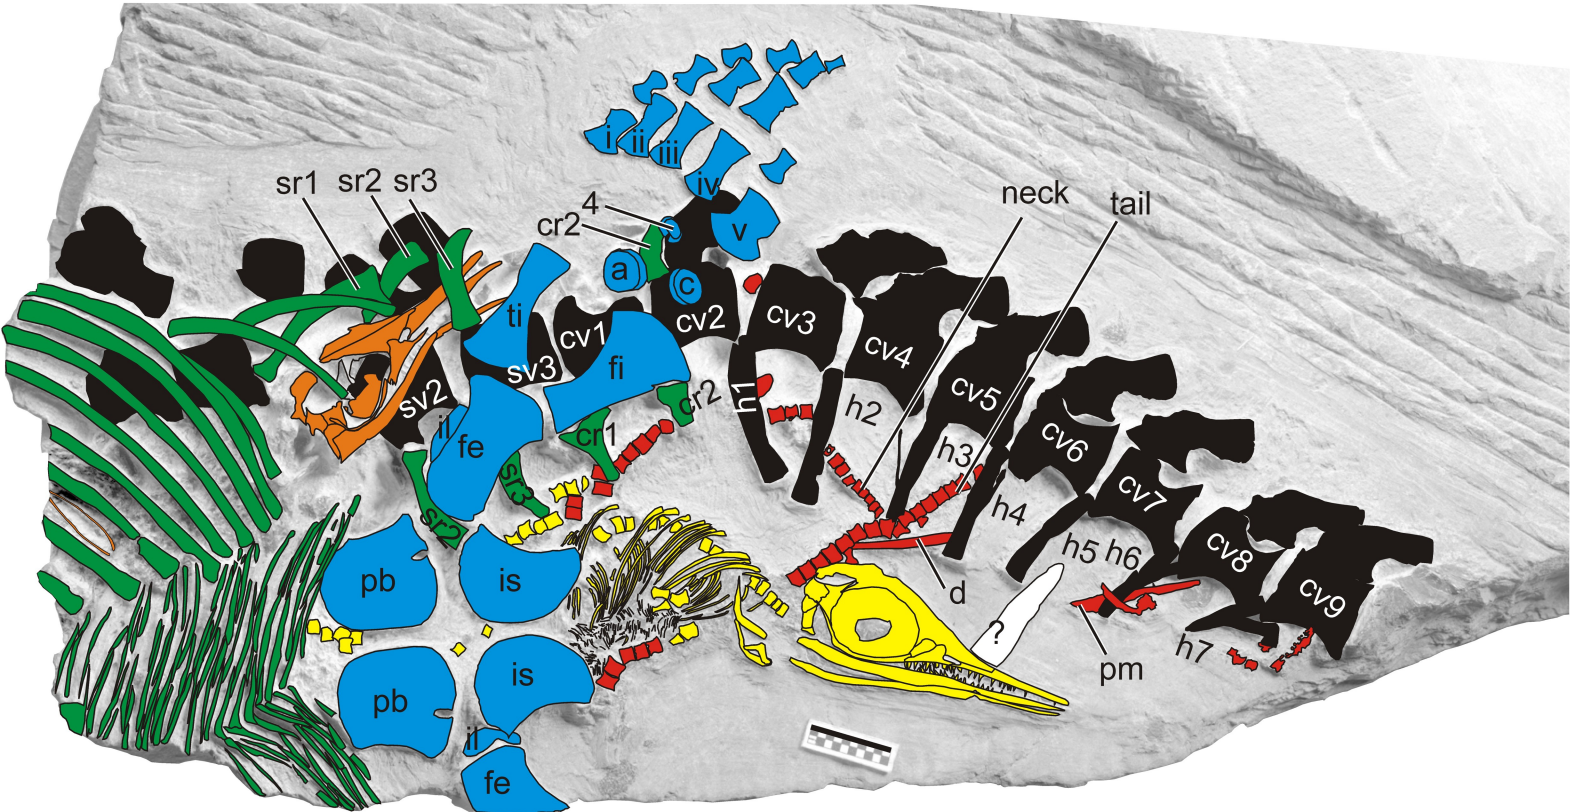

Supplement: S2 (10.1371/journal.pone.0088640.s002) [file journal.pone.0088640.s002]
