# Supplementary material for: Terrestrial Origin of Viviparity in Mesozoic Marine Reptiles Indicated by Early Triassic Embryonic Fossils
Source: PLOS journal article supplement (doi:10.1371/journal.pone.0088640), 2014-02-12

Figure S3. High resolution version of Fig. 3.

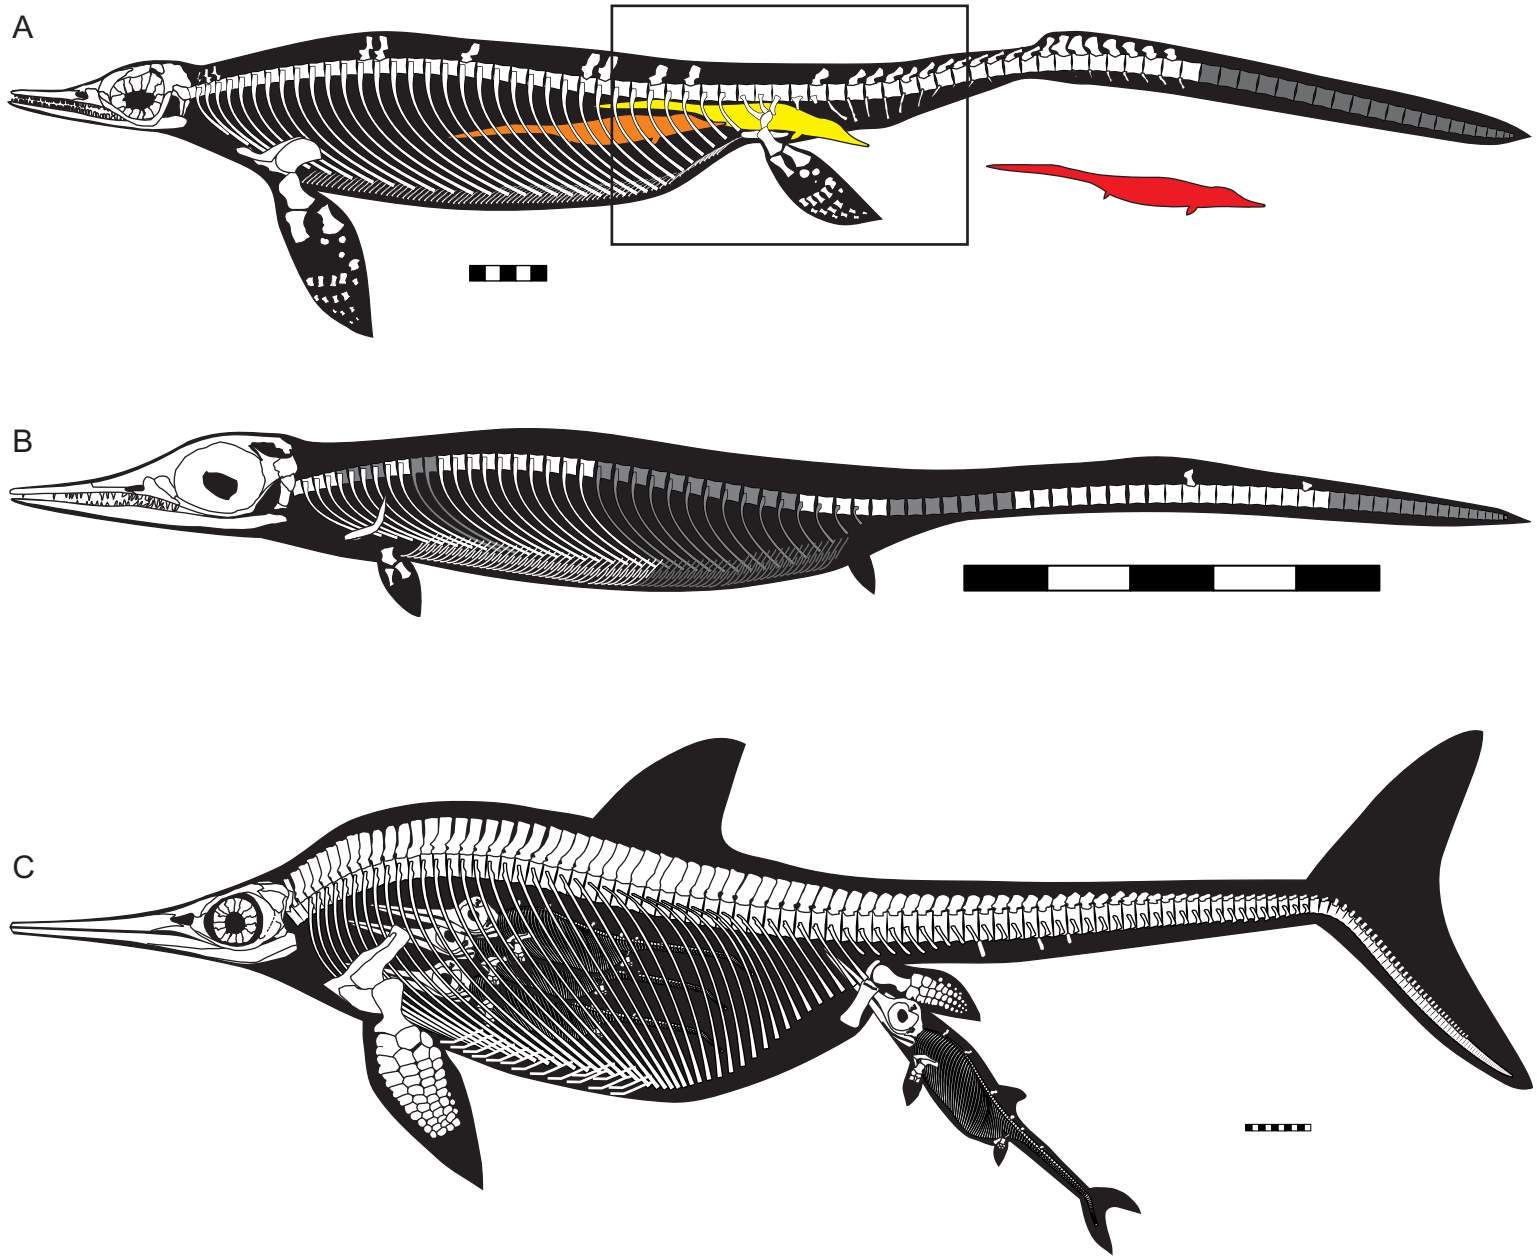

Supplement: S3 (10.1371/journal.pone.0088640.s003) [file journal.pone.0088640.s003]
